# Supplementary material for: Geometrical implication of ion transporters employing an ellipsoidal hollow structure in pseudo-solid electrolytes
Source: Royal Society of Chemistry journal article supplement (doi:10.1039/c4nr05965d), 2014-12-31
Supplement: c4nr05965d1.pdf [file c4nr05965d1.pdf]

## Supplementary Information

### Geometrical implication of ion transporters employing ellipsoidal hollow structure in oligomer electrolytes

Youngjin Kim<sup>a,b</sup>, Jong Hyuk Park<sup>a</sup>, Jihoon Jung<sup>c</sup>, Sang-Soo Lee<sup>\*a,b</sup>

<sup>a</sup> Photo-Electronic Hybrids Research Center, Korea Institute of Science and Technology, Seoul 136-791, Korea.

<sup>b</sup> KU-KIST Graduate School of Converging Science and Technology, Korea University, Seoul 136-701, Korea.

<sup>c</sup> Department of Chemical Engineering, Kyonggi University, Suwon 443-760, Korea.

[\*] Dr. Sang-Soo Lee, e-mail: [s-slee@kist.re.kr](mailto:s-slee@kist.re.kr), Tel: 82-2-958-5356, Fax: 82-2-958-5309

### Figures

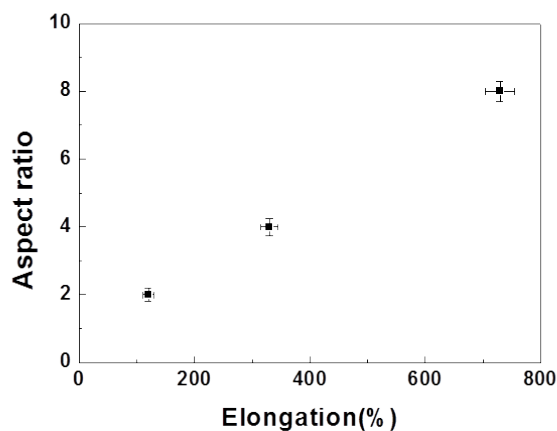

**Figure S1.** Aspect ratio of polystyrene (PS) particles to degree of elongation for poly(vinyl alcohol) films containing PS particles.

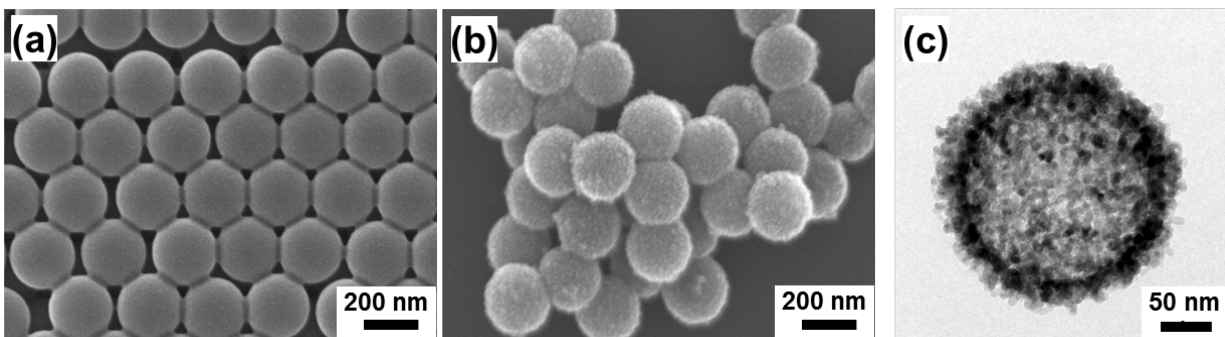

**Figure S2.** SEM images of (a) the pristine spherical PS particles and (b) the TiO<sub>2</sub> hollow spheres derived from formation of TiO<sub>2</sub>/PS core-shell hybrid particles and subsequent removal of PS component. (c) TEM image of the TiO<sub>2</sub> hollow spheres.

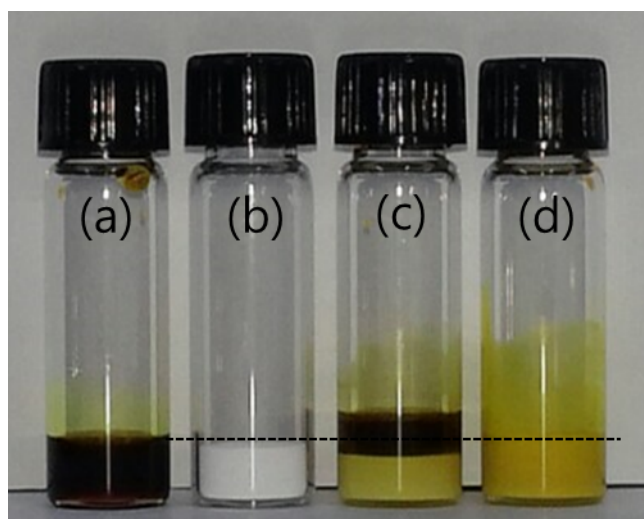

**Figure S3.** Photographs of (a) 0.9 g of oligomer electrolyte, (b) 0.1 g of TiO<sub>2</sub> hollow ellipsoidal particles, and composite electrolyte (c) prepared via pouring the oligomer electrolyte onto the hollow particles and (d) after complete mixing them. 0.1 g of TiO<sub>2</sub> hollow ellipsoidal particles has a comparable volume to 0.9 g of oligomer electrolyte. After mixing those components, the volume of the mixture hardly increases compared to that of the oligomer electrolyte.
